# Supplementary figures and images for: Photosystem II Repair Cycle in Faba Bean May Play a Role in Its Resistance to Botrytis fabae Infection
Source: MDPI journal article supplement (doi:10.3390/agronomy11112247), 2021-11-06

Figure S1

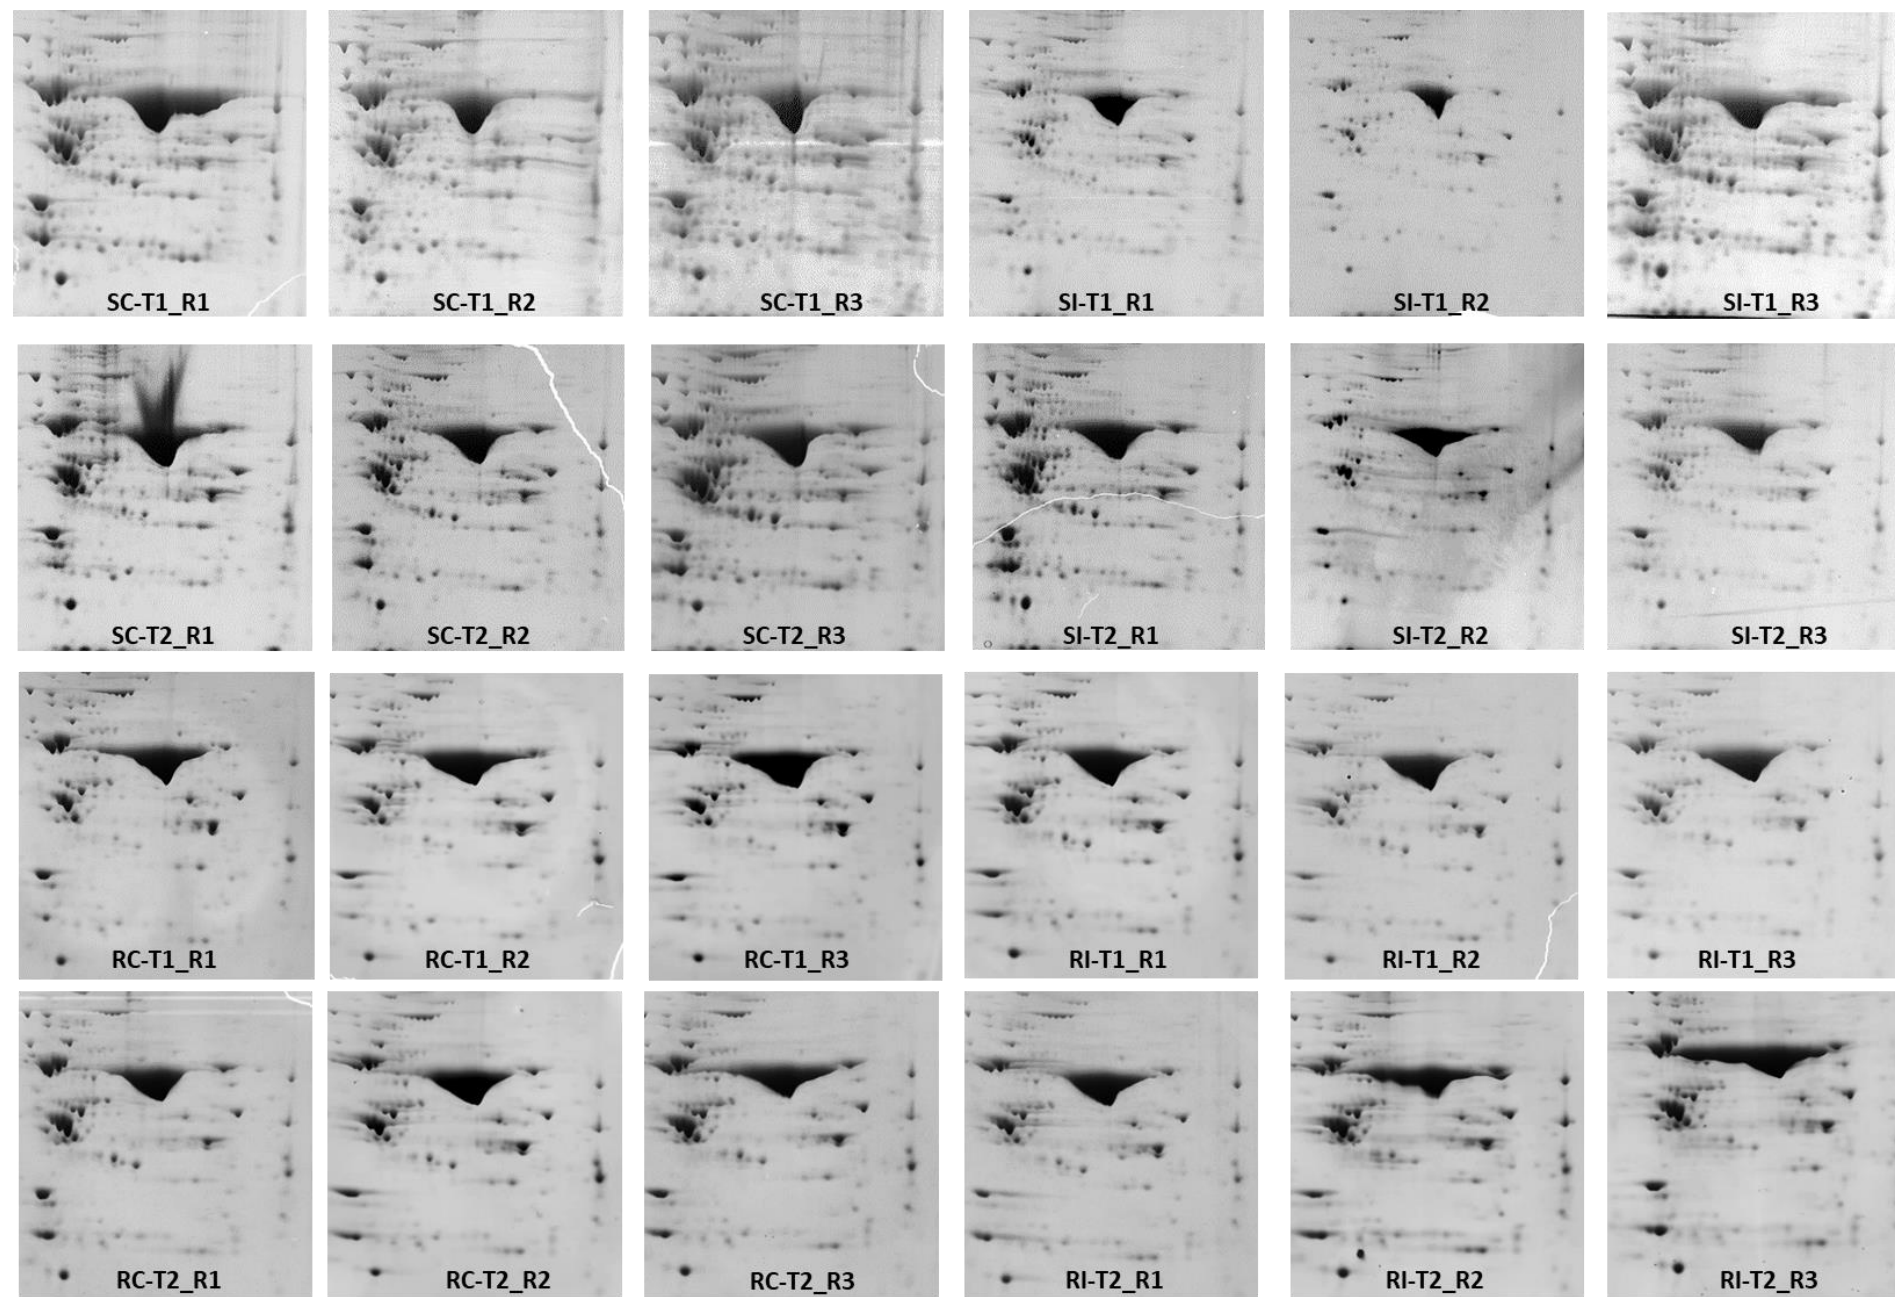

Figure S2

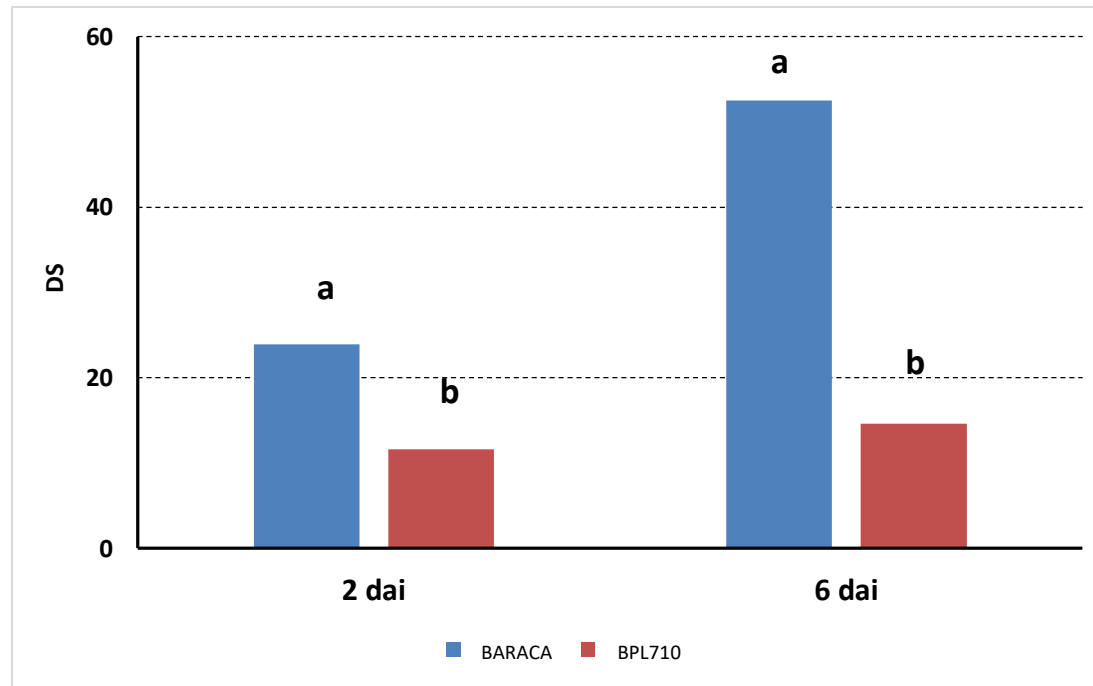

Figure S3

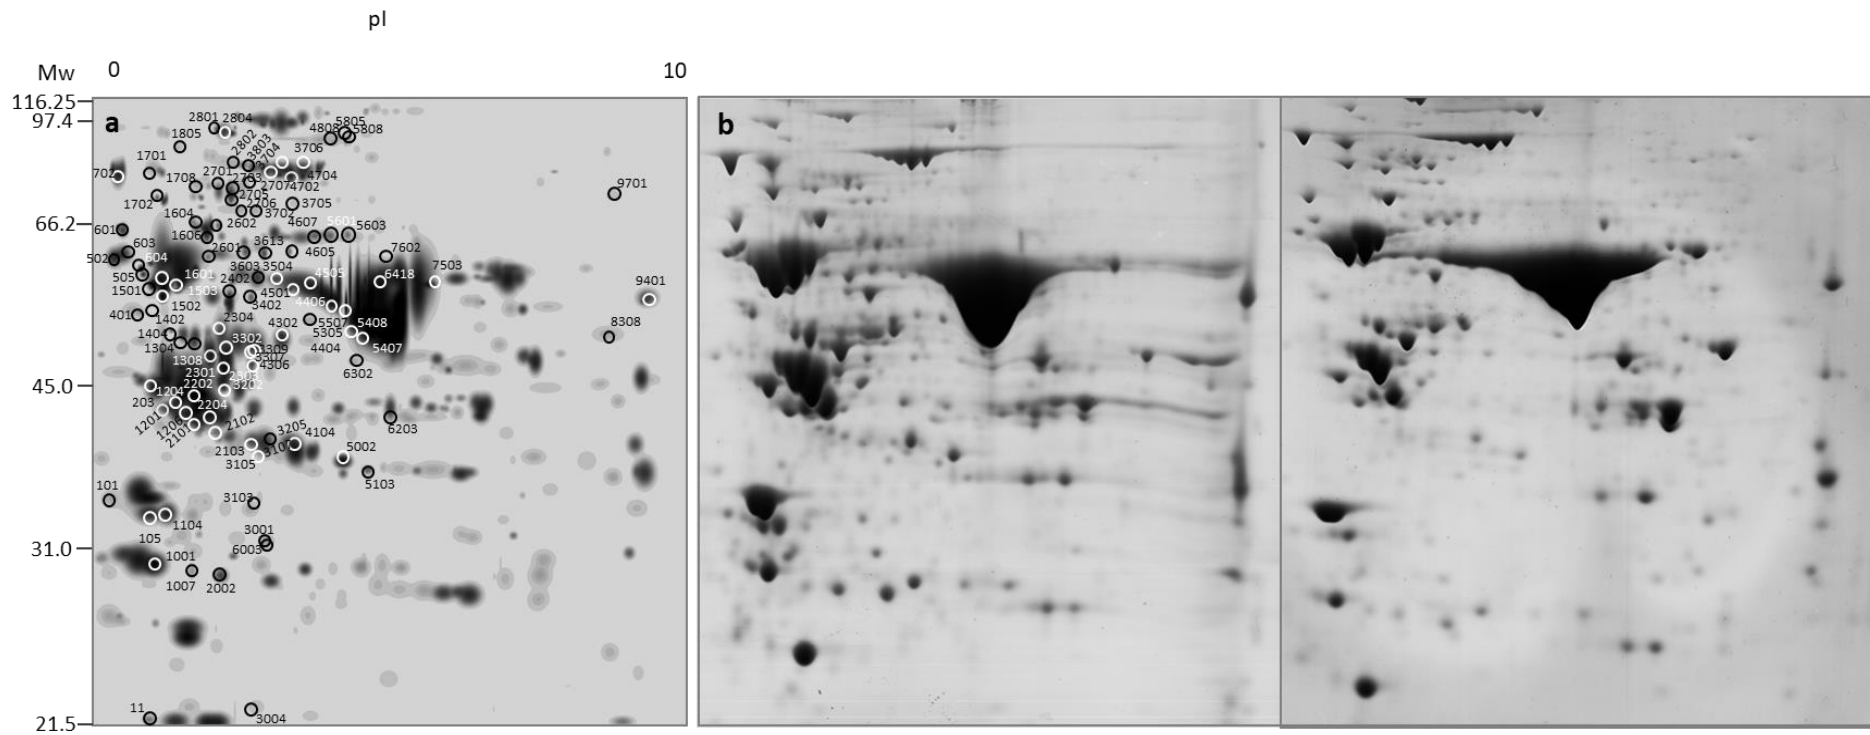

Figure S4

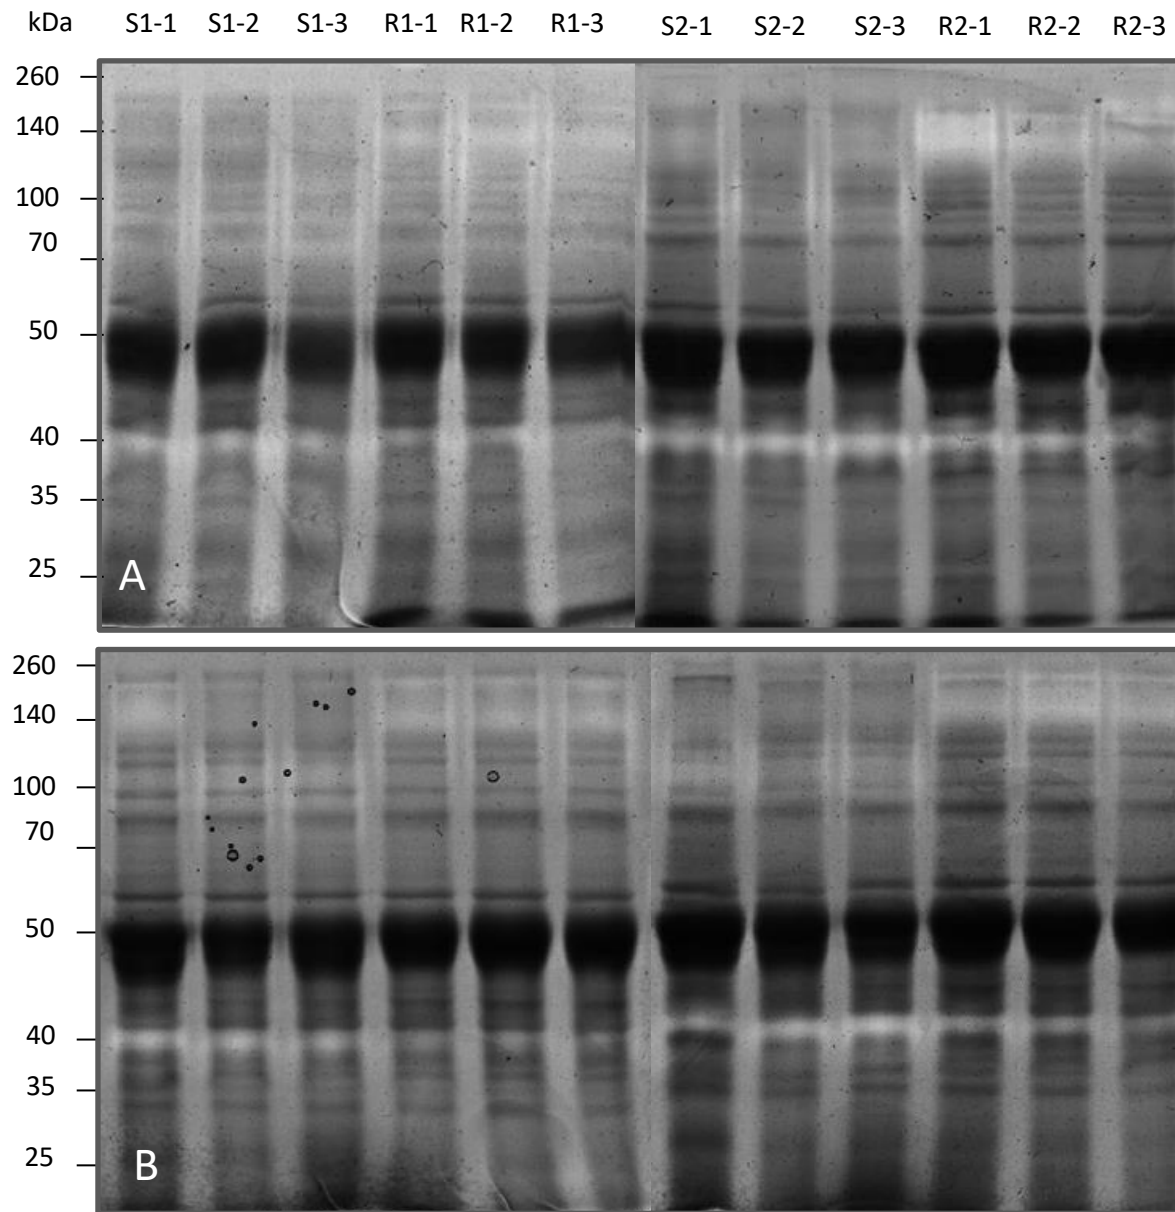

Figure S5

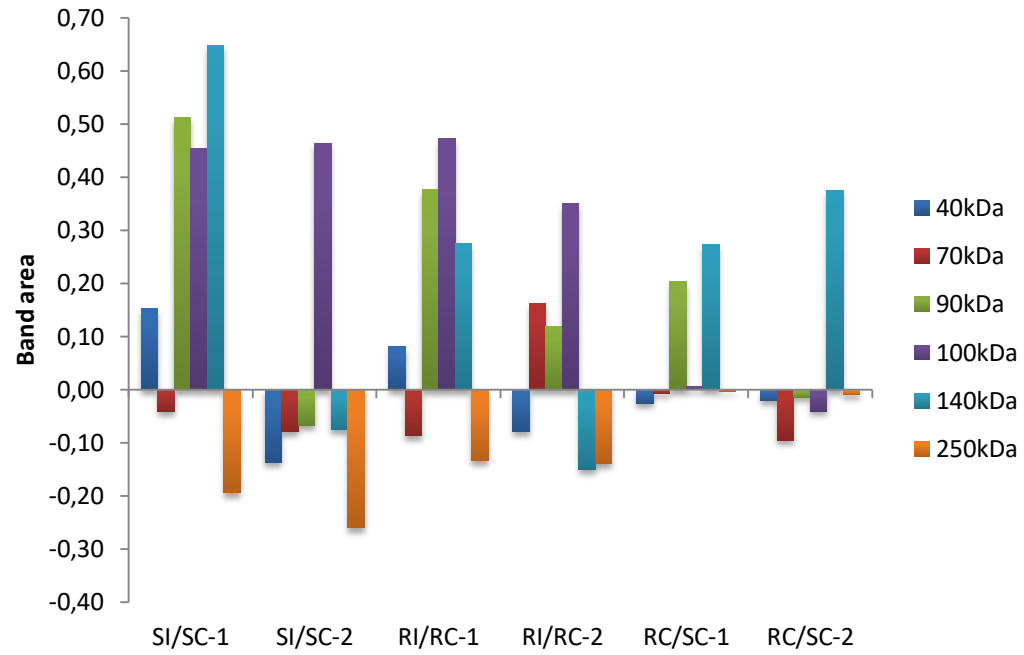

Supplement: s1 [file s1]
